# Supplementary material for: Identification of Small Molecule Inhibitors of Tau Aggregation by Targeting Monomeric Tau As a Potential Therapeutic Approach for Tauopathies
Source: PubMed Central journal article supplement — Curr Alzheimer Res. 2015 Sep;12(9):814–28. doi: 10.2174/156720501209151019104951 (PMC4976804; doi:10.2174/156720501209151019104951), 2015-09

## SUPPLEMENTARY MATERIALS

for

### Identification of small molecule inhibitors of Tau aggregation by targeting monomeric Tau as a potential therapeutic approach for Tauopathies

Marcus Pickhardt<sup>1</sup>, Thomas Neumann<sup>2</sup>, Daniel Schwizer<sup>2</sup>, Kari Callaway<sup>3</sup>, Michele Vendruscolo<sup>4</sup>, Dale Schenk<sup>3,5</sup>, Peter St. George-Hyslop<sup>6,7</sup>, Eva M. Mandelkow<sup>1,8,9</sup>, Christopher M. Dobson<sup>10</sup>, Lisa McConlogue<sup>3,11</sup>, Eckhard Mandelkow<sup>\*1,8,9</sup>, Gergely Tóth<sup>\*10,11</sup>

<sup>1</sup>*Deutsches Zentrum für Neurodegenerative Erkrankungen (DZNE), Ludwig-Erhard-Allee 2, 53175 Bonn, Germany*

<sup>2</sup>*Graffinity Pharmaceuticals, now NovAliX GmbH, Im Neuenheimer Feld 518, 69120 Heidelberg, Germany*

<sup>3</sup>*Elan Pharmaceuticals, 700 Gateway Boulevard, South San Francisco, CA 94080, USA*

<sup>4</sup>*Department of Chemistry, University of Cambridge, Lensfield Road, Cambridge CB2 1EW, UK*

<sup>5</sup>*Prothena Biosciences, South San Francisco, CA, USA*

<sup>6</sup>*Department of Clinical Neurosciences, University of Cambridge, Cambridge Institute for Medical Research, Addenbrooke's Hospital, Hills Road, Cambridge, CB2 0XY, United Kingdom*

<sup>7</sup>*Tanz Centre for Research in Neurodegenerative Diseases, University of Toronto, 6<sup>th</sup> Floor Krembil Discovery Tower, 60 Leonard Avenue, 6<sup>th</sup> Floor, 6KD417, Toronto, Ontario, M5T 2S8.*

<sup>8</sup>*Max Planck Institute for Neurological Research, Hamburg Outstation, c/o Deutsches Elektronen Synchrotron, Hamburg, Germany*

<sup>9</sup>*CAESAR Research Center/MPG, Ludwig-Erhard-Allee 2, 53175 Bonn, Germany*

<sup>10</sup>*Department of Clinical Neurosciences, Wolfson Brain Imaging Center, University of Cambridge, Addenbrooke's Hospital, Cambridge, CB2 0QQ, United Kingdom*

<sup>11</sup>*MTA-TTK-NAP B - Drug Discovery Research Group – Neurodegenerative Diseases, Institute of Organic Chemistry, Research Center for Natural Sciences, Hungarian Academy of Sciences, Budapest, Hungary*

\*Corresponding authors:

Gergely Tóth at [gt293@cam.ac.uk](mailto:gt293@cam.ac.uk), and Eckhard Mandelkow at [mand@mpasmb.desy.de](mailto:mand@mpasmb.desy.de)

**Figure S1:**

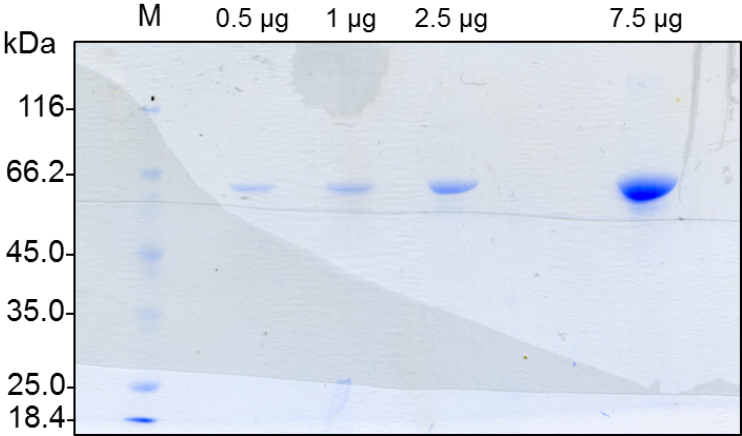

Figure S2A-C:

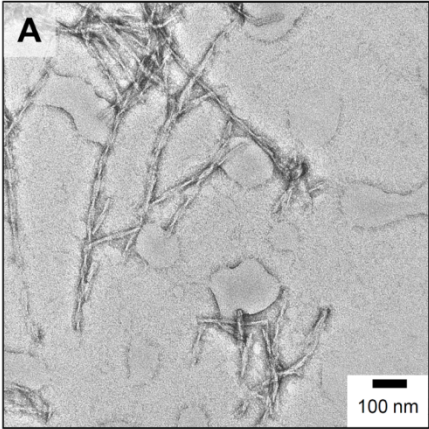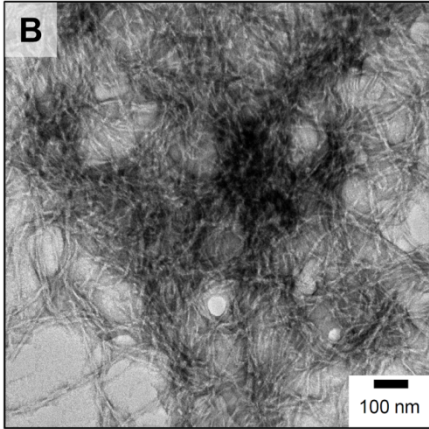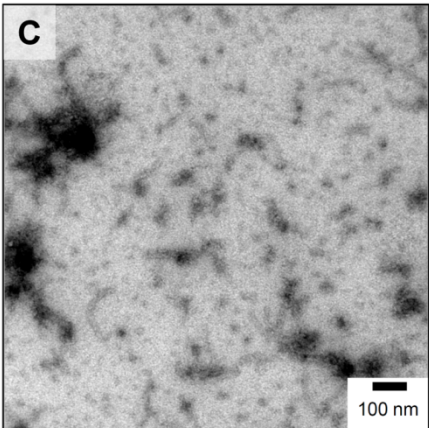

Figure S3A-D:

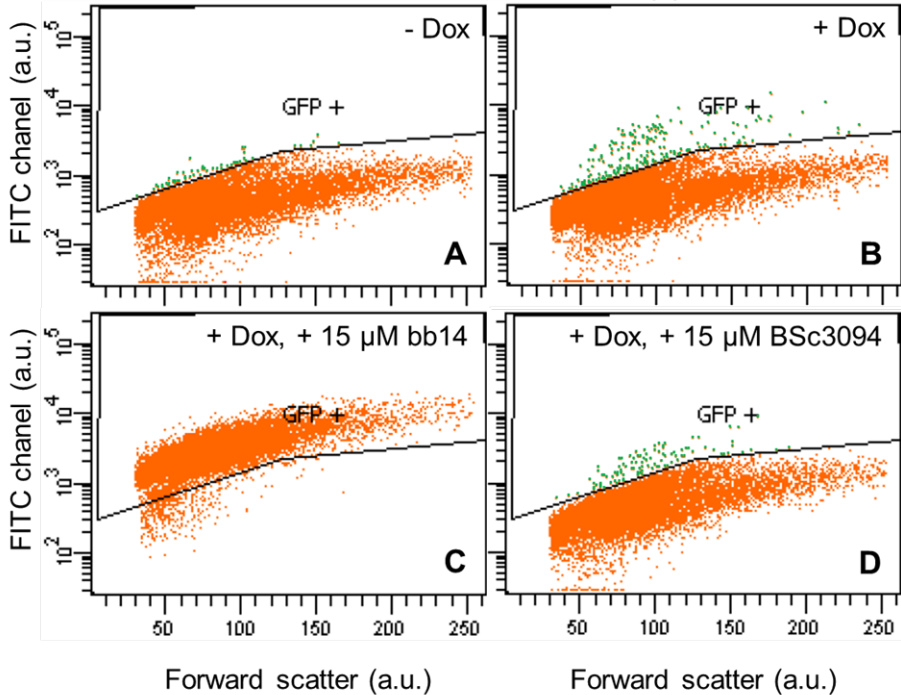

Supplement: NIHMS69441-supplement-Supplementary_Data.pdf [file NIHMS69441-supplement-Supplementary_Data.pdf]
